# Supplementary material for: Hollow Al2O3spheres prepared by a simple and tunable hydrothermal method
Source: Royal Society of Chemistry journal article supplement (doi:10.1039/c4ra12917b), 2015-01-01
Supplement: c4ra12917b1.pdf [file c4ra12917b1.pdf]

## **Hollow Al<sub>2</sub>O<sub>3</sub> Spheres Prepared by a Simple and Tunable Hydrothermal Method**

**Guangxin Xue,<sup>a,b</sup> Xin Huang,<sup>a,b</sup> Ning Zhao,<sup>b\*</sup> Fukui Xiao,<sup>b\*</sup> and Wei Wei<sup>c\*</sup>**

<sup>a</sup> State Key Laboratory of Coal Conversion, Institute of Coal Chemistry, Chinese Academy of Sciences, Taiyuan 030001, P. R. China.

<sup>b</sup> University of Chinese Academy of Sciences, Beijing 100049, P. R. China.

<sup>c</sup> Center for Greenhouse Gas and Environmental Engineering, Shanghai Advanced Research Institute, Chinese Academy of Sciences, Shanghai 201203, P. R. China.

### **Supporting Information**

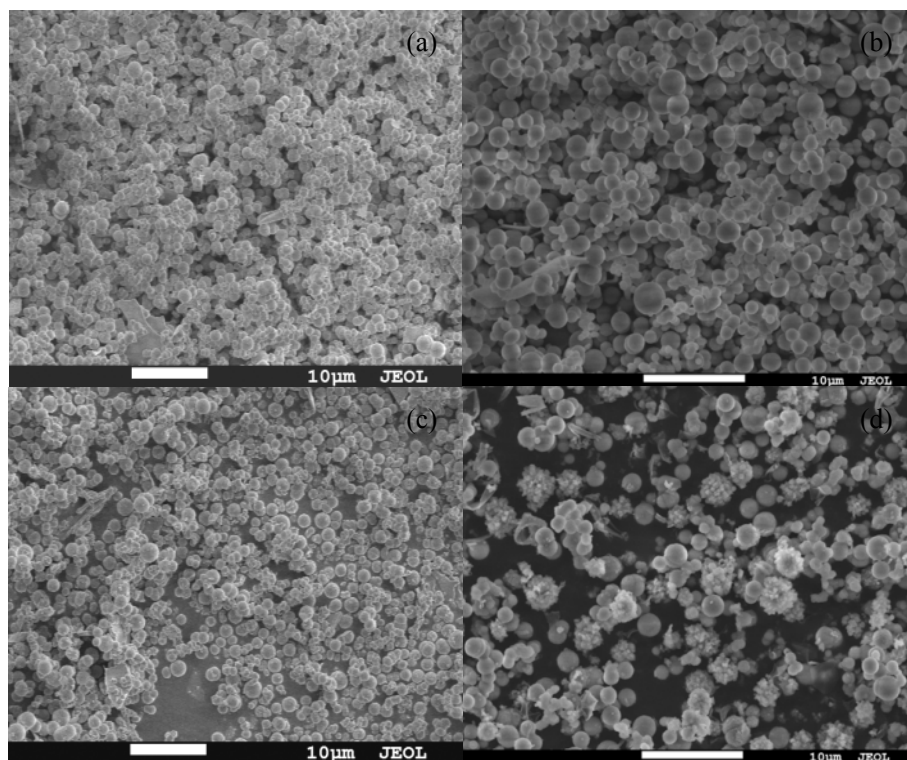

Figure S1. SEM images of the  $\text{Al}_2\text{O}_3$  prepared with different hydrothermal temperature of (a) 140°C, (b) 160°C, (c) 170°C, and (d) 180°C.

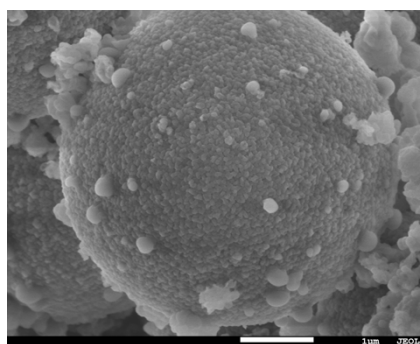

Figure S2. SEM images of the  $\text{Al}_2\text{O}_3$  prepared using ethanol as additive.

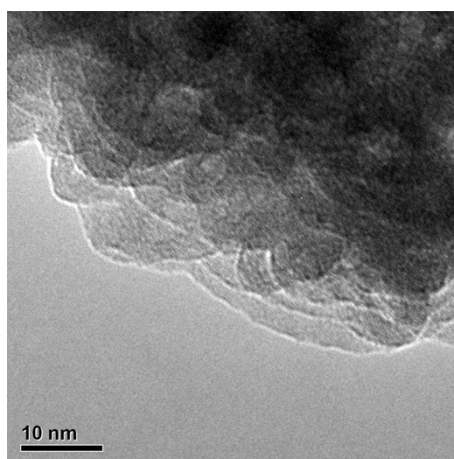

Figure S3. HRTEM images of the  $\text{Al}_2\text{O}_3$  calcined at  $550^\circ\text{C}$

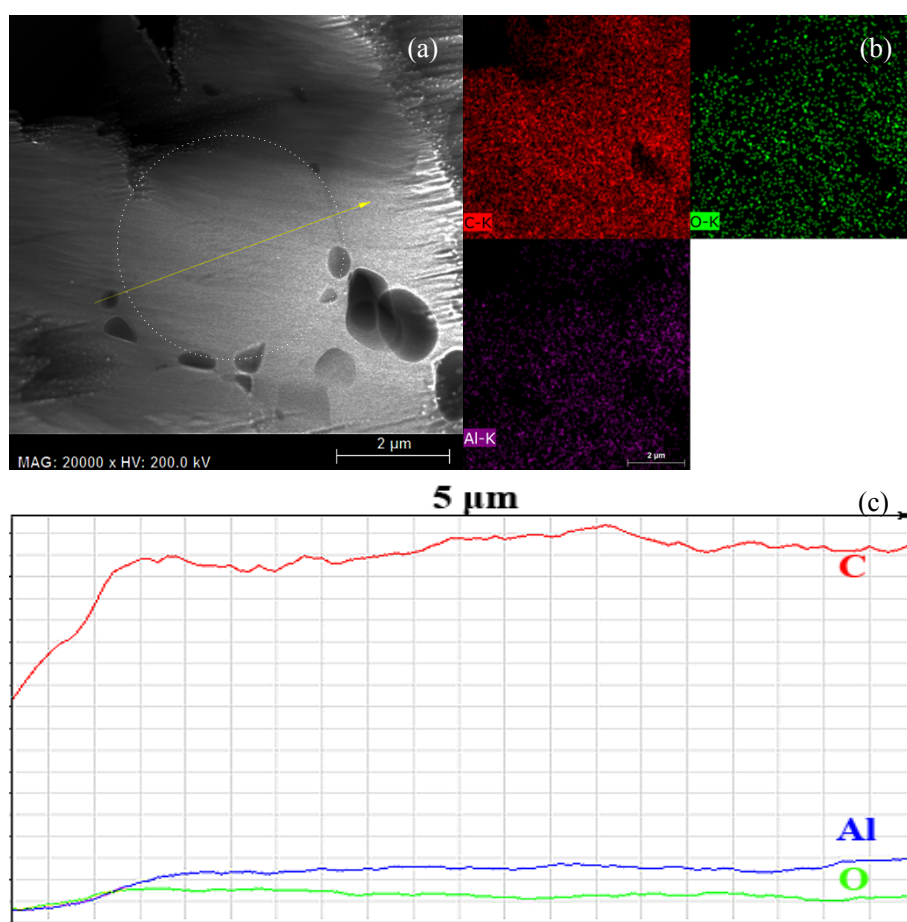

Figure S4. TEM images of (a) the ultramicrotomed precursor microsphere (the white dotted lines indicate the edge of the microsphere), corresponding (b) elemental area mapping and (c) elemental linear mapping of the cross-section.

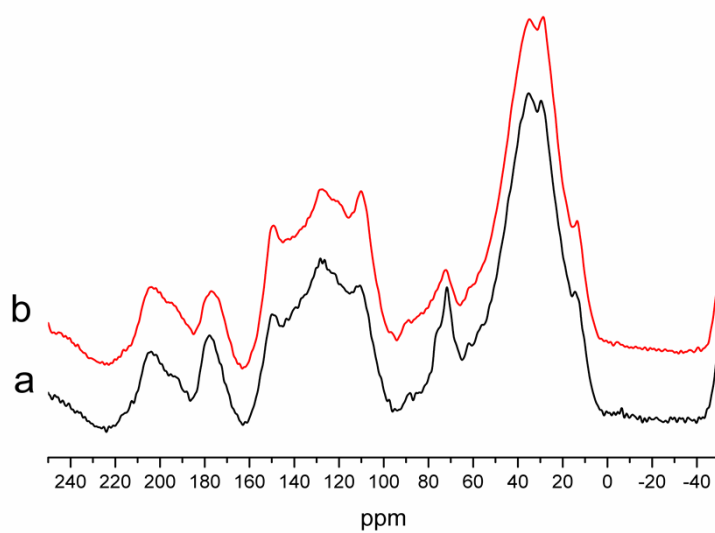

Figure S5.  $^{13}\text{C}$  MAS NMR spectra obtained with MAS spin rate at 10.5 kHz of the (a) carbon spheres, and (b) precursor.
